# Supplementary material for: Physiological and metabolic insights into the first cultured anaerobic representative of deep-sea Planctomycetes bacteria
Source: bioRxiv or medRxiv preprint supplement (doi:10.1101/2023.07.18.549452), 2023-09-01
Supplement: Supplementary file [file media-1.pdf]

1 **Supplementary Information**

2 **Physiological and metabolic insights into the first cultured anaerobic**  
3 **representative of deep-sea *Planctomyces* bacteria**

4 Rikuan Zheng<sup>1,2,4</sup>, Chong Wang<sup>1,2,4</sup>, Rui Liu<sup>1,2,4</sup>, Ruining Cai<sup>1,2,3,4</sup>, Chaomin Sun<sup>1,2,4\*</sup>

5 <sup>1</sup>CAS and Shandong Province Key Laboratory of Experimental Marine Biology &  
6 Center of Deep Sea Research, Institute of Oceanology, Chinese Academy of  
7 Sciences, Qingdao, China

8 <sup>2</sup>Laboratory for Marine Biology and Biotechnology, Qingdao National Laboratory  
9 for Marine Science and Technology, Qingdao, China

10 <sup>3</sup>College of Earth Science, University of Chinese Academy of Sciences, Beijing,  
11 China

12 <sup>4</sup>Center of Ocean Mega-Science, Chinese Academy of Sciences, Qingdao, China

13 \* Corresponding author

14 Chaomin Sun Tel.: +86 532 82898857; fax: +86 532 82898857.

15 E-mail address: [sunchaomin@qdio.ac.cn](mailto:sunchaomin@qdio.ac.cn)

16

17

18

19

20

## 21 **Supplementary Results**

### 22 **Genomic and physiologic analyses of strain ZRK32**

23 To understand more characteristics of strain ZRK32, its whole genome was sequenced  
24 and analyzed. The genome size of strain ZRK32 was 5,234,020 bp with a DNA G+C  
25 content of 46.28 mol% (Figure. S3). Annotation of the genome of strain ZRK32  
26 revealed that it consisted of 4,175 predicted genes including 6 rRNA genes (2, 2, and  
27 2 for 5S, 16S, and 23S, respectively) and 45 tRNA genes, which were higher than  
28 those reported in the most closely related type strain *Poriferisphaera corsica* KS4<sup>T</sup>  
29 (Table S1). Moreover, the genome size (5,234,020 bp) and gene numbers (4,175) of  
30 strain ZRK32 were also higher than those in strain KS4<sup>T</sup> (4,291,168 bp, 3,714). Strain  
31 ZRK32 was able to grow over a temperature range of 4-32 °C (optimum, 28 °C),  
32 which was wider than that of strain KS4<sup>T</sup> (15-30 °C, optimum 27 °C) (Figure. S4A).  
33 The pH range for growth of strain ZRK32 was 6.0-8.0 (optimum, pH 7.0) (Figure.  
34 S4B). Growth of strain ZRK32 was observed at 0.5-5.0% NaCl (Figure. S4C).

### 35 **Description of *Poriferisphaera heterotrophicis* sp. nov.**

36 *Poriferisphaera heterotrophicis* (hetero'tro.phicis. L. fem. adj. *heterotrophicis* means a  
37 heterotrophic lifestyle). Cells are spherical, average diameter of 0.4-1.0 µm, strictly  
38 anaerobic and have a single polar flagellum. The temperature range for growth is  
39 4-32 °C with an optimum at 28 °C. Growing at pH values of 6.0-8.0 (optimum, pH  
40 7.0). Growth occurs at NaCl concentrations from 0.5% to 5.0%. The type strain,  
41 ZRK32<sup>T</sup>, was isolated from a deep-sea cold seep sediment, P. R. China. The DNA  
42 G+C content of the type strain is 46.28 mol%.

## 43 **Supplementary Methods**

### 44 **Physiological tests**

45 Effects of temperature, pH, and NaCl concentration on the growth of strain ZRK32  
46 were determined in the rich medium as described above. To evaluate the temperature  
47 range for growth, cultures were incubated at 4, 16, 24, 28, 32, 37, 45, 60 °C (pH 7.0).

48 To determine the pH range for growth, the medium was adjusted at optimum  
49 temperature (28 °C) to pH 4.0-10.0 with increments of 0.5 pH units under a 100% N<sub>2</sub>  
50 atmosphere. NaCl requirements were tested in the modified rich medium (without  
51 20.0 g/L NaCl) supplemented with 0-10% (w/v) NaCl (1.0% intervals). Single sugar  
52 (including glucose, maltose, fructose, sucrose, starch, isomaltose, trehalose, galactose,  
53 cellulose, xylose, D-mannose, and rhamnose) was added from sterile filtered stock  
54 solutions to the final concentration at 20 mM, respectively. Cell culture containing  
55 only 0.02 g yeast extract (L<sup>-1</sup>) without adding any other substrates was used as a  
56 control. These cultures were incubated at 28 °C for 14 days and then the OD<sub>600</sub> values  
57 were measured via a microplate reader (Infinite M1000 Pro; Tecan, Mannedorf,  
58 Switzerland). For each experiment, three biological replicates were performed.

### 59 **Genome sequencing, annotation, and analysis of strain ZRK32**

60 For genomic sequencing, strain ZRK32 was grown in the liquid rich medium and  
61 harvested after one week of incubation at 28 °C. Genomic DNA was isolated by using  
62 the PowerSoil DNA isolation kit (Mo Bio Laboratories Inc., Carlsbad, CA).  
63 Thereafter, the genome sequencing was carried out with both the Illumina NovaSeq  
64 PE150 (San Diego, USA) and Nanopore PromethION platform (Oxford, UK) at the  
65 Beijing Novogene Bioinformatics Technology Co., Ltd. A complete description of the  
66 library construction, sequencing, and assembly was performed as previously  
67 described (Zheng et al., 2021). We used seven databases to predict gene functions,  
68 including Pfam (Protein Families Database, <http://pfam.xfam.org/>), GO (Gene  
69 Ontology, <http://geneontology.org/>) (Ashburner et al., 2000), KEGG (Kyoto  
70 Encyclopedia of Genes and Genomes, <http://www.genome.jp/kegg/>) (Kanehisa et al.,  
71 2004), COG (Clusters of Orthologous Groups, <http://www.ncbi.nlm.nih.gov/COG/>)  
72 (Galperin et al., 2015), NR (Non-Redundant Protein Database databases), TCDB  
73 (Transporter Classification Database), and Swiss-Prot (<http://www.ebi.ac.uk/uniprot/>)  
74 (Bairoch and Apweiler, 2000). A whole genome Blast search (E-value less than 1e-5,  
75 minimal alignment length percentage larger than 40%) was performed against above

76 seven databases.

77 In addition, the genome relatedness values were calculated by multiple  
78 approaches, including Average Nucleotide Identity (ANI) based on the MUMMER  
79 ultra-rapid aligning tool (ANIm) and the BLASTN algorithm (ANIb), the  
80 tetranucleotide signatures (Tetra), and *in silico* DNA-DNA (*isDDH*) similarity. ANIm,  
81 ANIb, and Tetra values were calculated using the JSpecies WS  
82 (<http://jspecies.ribohost.com/jspeciesws/>) (Richter et al., 2016). The recommended  
83 species criterion cut-offs were used: 95% for the ANIb and ANIm, 0.99 for the Tetra  
84 signature. The *isDDH* similarity values were calculated by the Genome-to-Genome  
85 Distance Calculator (GGDC) (<http://ggdc.dsmz.de/>) (Meier-Kolthoff et al., 2013). A  
86 value of 70% *isDDH* similarity was used as a recommended standard for delineating  
87 species.

88 **The detailed procedure for transcriptomic sequencing analysis of strain ZRK32**  
89 **cultured under different conditions.**

90 **(1) Library preparation for strand-specific transcriptome sequencing.** A total  
91 amount of 3 µg RNA per sample was used as input material for the RNA sample  
92 preparation. Sequencing libraries were generated using NEBNext<sup>®</sup> Ultra<sup>™</sup>  
93 Directional RNA Library Prep Kit for Illumina<sup>®</sup> (NEB, USA) following the  
94 manufacturer's recommendations and index codes were added to attribute sequences  
95 to each sample. Then, rRNA was removed using a specialized kit that left the mRNA.  
96 Fragmentation was carried out using divalent cations under elevated temperature in  
97 NEBNext First Strand Synthesis Reaction Buffer (5×). First strand cDNA was  
98 synthesized using random hexamer primer and M-MuLV Reverse Transcriptase  
99 (RNaseH<sup>-</sup>). Second strand cDNA synthesis was subsequently performed using DNA  
100 Polymerase I and RNase H. In the reaction buffer, dNTPs with dTTP were replaced  
101 by dUTP. Remaining overhangs were converted into blunt ends via  
102 exonuclease/polymerase activities. After adenylation of 3' ends of DNA fragments,  
103 NEBNext Adaptor with hairpin loop structure was ligated to prepare for hybridization.

104 In order to select cDNA fragments of preferentially 150~200 bp in length, the library  
105 fragments were purified with AMPure XP system (Beckman Coulter, USA). Then 3  
106  $\mu$ L USER Enzyme (NEB, USA) was used with size-selected, adaptor-ligated cDNA  
107 at 37 °C for 15 min followed by 5 min at 95 °C before PCR. PCR was performed with  
108 Phusion High-Fidelity DNA polymerase, Universal PCR primers, and Index (X)  
109 Primer. At last, products were purified (AMPure XP system) and library quality was  
110 assessed on the Agilent Bioanalyzer 2100 system.

111 **(2) Clustering and sequencing.** The clustering of the index-coded samples was  
112 performed on a cBot Cluster Generation System using TruSeq PE Cluster Kit  
113 v3-cBot-HS (Illumina) according to the manufacturer's instructions. After cluster  
114 generation, the library preparations were sequenced on an Illumina HiSeq platform  
115 and paired-end reads were generated.

116 **(3) Data analysis.** Raw data of fastq format were firstly processed through in-house  
117 perl scripts. In this step, clean data were obtained by removing reads containing  
118 adapter, reads containing ploy-N and low quality reads from raw data. At the same  
119 time, Q20, Q30, and GC content the clean data were calculated. All the downstream  
120 analyses were based on the clean data with high quality. Reference genome and gene  
121 model annotation files were downloaded from genome website directly. Both building  
122 index of reference genome and aligning clean reads to reference genome were used  
123 Bowtie2-2.2.3 (setting: -D 15 -R 2 -N 0 -L 22 -i S,1,1.15) (Langmead and Salzberg,  
124 2012). HTSeq v0.6.1 (default parameters) was used to count the reads numbers  
125 mapped to each gene. FPKM of each gene was calculated based on the length of the  
126 gene and reads count mapped to this gene. FPKM, expected number of Fragments Per  
127 Kilobase of transcript sequence per Millions base pairs sequenced, considers the  
128 effect of sequencing depth and gene length for the reads count at the same time, and is  
129 currently the most commonly used method for estimating gene expression levels  
130 (Trapnell et al., 2009).

131 **(4) Differential expression analysis.** Differential expression analysis was performed  
132 using the DESeq R package (1.18.0) and edgeR v3.24.3 ( $|\log_2(\text{Fold change})| \geq 1$  &  
133  $\text{padj} \leq 0.05$ ) (Anders and Huber, 2010). DESeq provide statistical routines for  
134 determining differential expression in digital gene expression data using a model  
135 based on the negative binomial distribution. The resulting  $P$ -values were adjusted  
136 using the Benjamini and Hochberg's approach for controlling the false discovery rate.  
137 Genes with an adjusted  $P$ -value  $< 0.05$  found by DESeq were assigned as  
138 differentially expressed. (For DESeq without biological replicates) Prior to  
139 differential gene expression analysis, for each sequenced library, the read counts were  
140 adjusted by edgeR program package through one scaling normalized factor.  
141 Differential expression analysis of two conditions was performed using the DESeq  
142 R package (1.20.0) (Wang et al., 2010). The  $P$  values were adjusted using the  
143 Benjamini & Hochberg method. Corrected  $P$ -value of 0.005 and  $\log_2(\text{Fold change})$  of  
144 1 were set as the threshold for significantly differential expression.

145 **(5) GO and KEGG enrichment analysis of differentially expressed genes.** Gene  
146 Ontology (GO) enrichment analysis of differentially expressed genes was  
147 implemented by the Goseq R package, in which gene length bias was corrected  
148 (Young et al., 2010). GO terms with corrected  $P$  value less than 0.05 were considered  
149 significantly enriched by differential expressed genes. KEGG is a database resource  
150 for understanding high-level functions and utilities of the biological system, such as  
151 the cell, the organism, and the ecosystem, from molecular-level information,  
152 especially large-scale molecular datasets generated by genome sequencing and other  
153 high-throughput experimental technologies (<http://www.genome.jp/kegg/>) (Kanehisa  
154 et al., 2008). We used KOBAS software to test the statistical enrichment of  
155 differential expression genes in KEGG pathways.

#### 156 **Real-Time Quantitative Reverse Transcription PCR (qRT-PCR).**

157 To validate the RNA-seq data, we determined the expression levels of some genes by  
158 qRT-PCR. For qRT-PCR, cells of strain ZRK32 cultured in 1.5 L of either basal

159 medium, rich medium, or rich medium supplemented with different nitrogen sources  
160 (20 mM NO<sub>3</sub><sup>-</sup>, 20 mM NH<sub>4</sub><sup>+</sup> or 20 mM NO<sub>2</sub><sup>-</sup>, respectively) at 28 °C for six days were  
161 collected at 8000 × g for 20 minutes. Three biological replicates were cultured for  
162 each condition. Total RNA from each sample was extracted using the Trizol reagent  
163 (Solarbio, China). The RNA concentration was measured using Spectrophotometer  
164 (NanoPhotometer NP80, Implen, Germany). Then RNAs from corresponding samples  
165 were reverse transcribed into cDNA (complementary DNA) using ReverTra Ace™  
166 qPCR RT Master Mix with gDNA Remover (TOYOBO, Japan). The transcriptional  
167 levels of different genes were determined by qRT-PCR using SYBR® Green  
168 Realtime PCR Master Mix (TOYOBO, Japan) and the QuantStudio™ 6 Flex (Thermo  
169 Fisher Scientific, USA). The PCR condition was set as following: initial denaturation  
170 at 95 °C for 3 min, followed by 40 cycles of denaturation at 95 °C for 10 s, annealing  
171 at 56 °C for 20 s, and extension at 72 °C for 20 s. The 16S rRNA gene of strain  
172 ZRK32 was used as an internal reference and the gene expression was calculated  
173 using the 2<sup>-ΔΔCt</sup> method (Livak and Schmittgen, 2001), with each transcript signal  
174 normalized to that of 16S rRNA gene. Transcript signals for each treatment were  
175 compared to those of control group. Specific primers for genes associated with the  
176 TCA cycle, NADH-ubiquinone oxidoreductase, flagellum assembly, and EMP  
177 glycolysis of strain ZRK32 and 16S rRNA gene were designed using Primer 5.0 as  
178 shown in Table S4. All qRT-PCR runs were conducted with three biological and three  
179 technical replicates.

### 180 **A detailed procedure for genome sequencing analysis of phages**

181 To sequence the genome of bacteriophage, the phage genomic DNA was extracted  
182 from different purified phage particles. Firstly, to remove residual host DNA, 1 μg/mL  
183 DNase I and RNase A were added to the concentrated phage solution for nucleic acid  
184 digestion overnight at 37 °C. The digestion treatment was inactivated at 80 °C for 15  
185 min, followed by extraction with a Viral DNA Kit (Omega Bio-tek, USA) according  
186 to the manufacturer's instructions. Then, the genome sequencing was performed by

187 Biozeron Biological Technology Co.Ltd (Shanghai, China). The detailed process of  
188 library construction, sequencing, genome assembly, and annotation was described  
189 below.

190 **(1) Library construction and Illumina HiSeq sequencing.** Briefly, for Illumina  
191 pair-end sequencing of each phage, 0.2 µg genomic DNA was used for the sequencing  
192 library construction. Paired-end libraries with insert sizes of ~400 bp were prepared  
193 following the standard procedure. The purified genomic DNA was sheared into  
194 smaller fragments with a desired size by Covaris, and blunt ends were generated using  
195 the T4 DNA polymerase. The desired fragments were purified through  
196 gel-electrophoresis, then enriched and amplified by PCR. The index tag was  
197 introduced into the adapter at the PCR stage and we performed a library quality test.  
198 Finally, the qualified Illumina pair-end library was used for Illumina NovaSeq 6000  
199 sequencing (150 bp\*2, Shanghai BIOZERON Co., Ltd).

200 **(2) Genome assembly.** The raw paired end reads were trimmed and quality controlled  
201 by the Trimmomatic (version 0.36,  
202 <http://www.usadellab.org/cms/uploads/supplementary/Trimmomatic>) (Pollet et al.,  
203 2011) with parameters (SLIDINGWINDOW: 4:15, MINLEN: 75). Clean data were  
204 obtained and used for further analysis. We have used the ABySS software  
205 (<http://www.bcgsc.ca/platform/bioinfo/software/abyss>) to perform genome assembly  
206 with multiple-Kmer parameters and got the optimal results. The GapCloser software  
207 (<https://sourceforge.net/projects/soapdenovo2/files/GapCloser/>) was subsequently  
208 applied to fill up the remaining local inner gaps and correct the single base  
209 polymorphism for the final assembly results.

210 **(3) Genome Annotation.** For bacteriophages, these obtained genome sequences were  
211 subsequently annotated by searching these predicted genes against non-redundant  
212 (NR in NCBI, 20180814), SwissProt (release-2021\_03, <http://uniprot.org>) (Dedysh  
213 and Ivanova, 2019), KEGG (Release 94.0, <http://www.genome.jp/kegg/>) (Buckley et  
214 al., 2006), COG (update-2020\_03, <http://www.ncbi.nlm.nih.gov/COG>) (Brümmer et



215 al., 2004), and CAZy (update-2021\_09, <http://www.cazy.org/>) (Woebken et al., 2007)  
216 databases.

217

218

219

220

221

222

223

224

225

226

227

228

229

230

231

232

233

234

235

236

237

238 **Supplementary Figures**

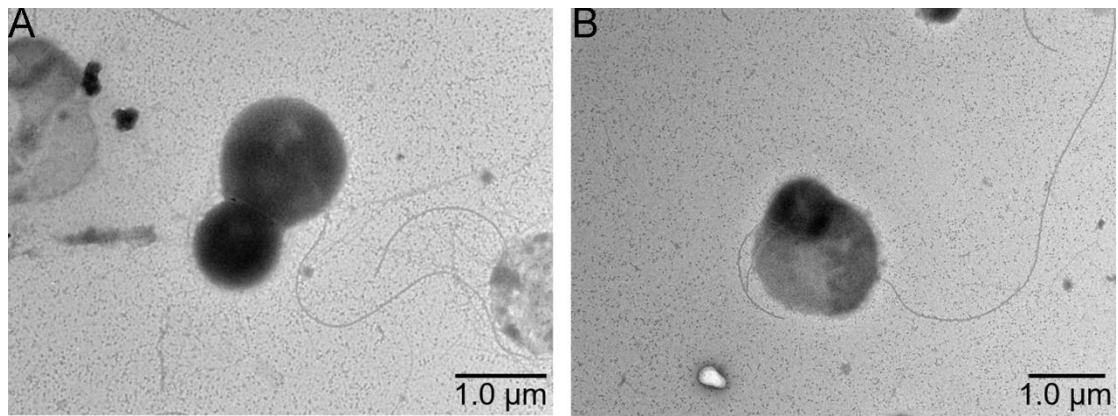

239

240 **Figure S1. TEM observation the morphology of cells from *P. heterotrophicis***  
241 **ZRK32.**

242

243

244

245

246

247

248

249

250

251

252

253

254

255

256

257

258

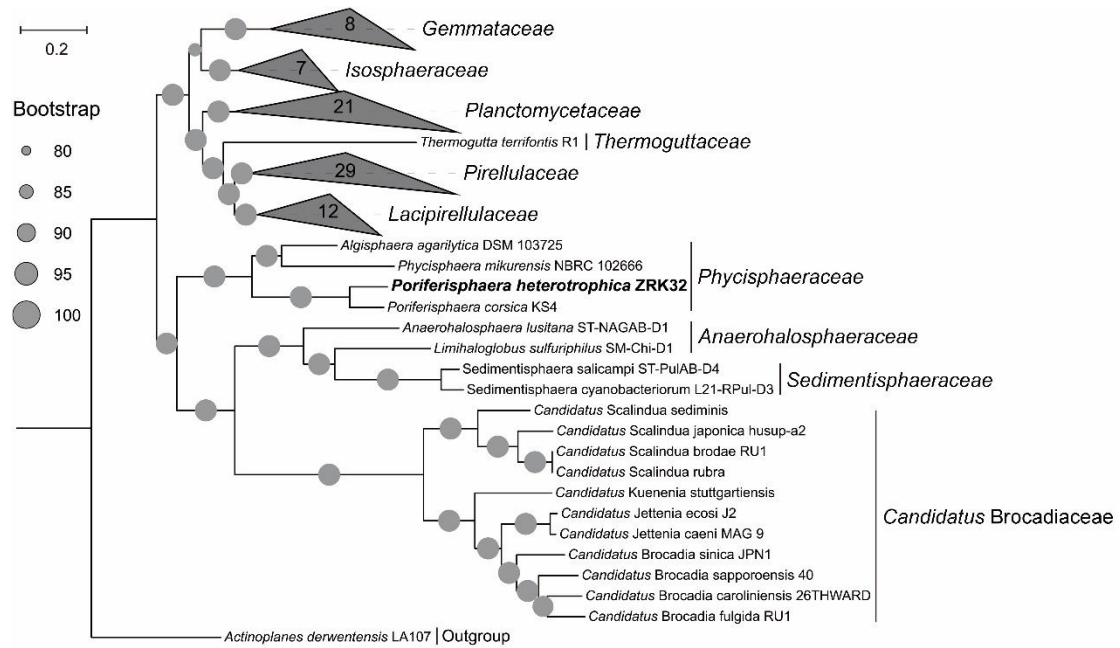

259

260 **Figure S2. Maximum likelihood phylogenetic tree of genome sequences from the**  
 261 ***P. heterotrophicis* ZRK32 and other *Planctomycetes* bacteria constructed from**  
 262 **the concatenated alignment of 37 single-copy genes; *Actinoplanes derwentensis***  
 263 **LA107 was used as the outgroup. The tree was inferred and reconstructed using the**  
 264 **maximum likelihood criterion, with bootstrap values (%) > 80; these are indicated at**  
 265 **the base of each node with a gray dot (expressed as a percentage from 1,000**  
 266 **replications). Bar, 0.2 substitutions per nucleotide position.**

267

268

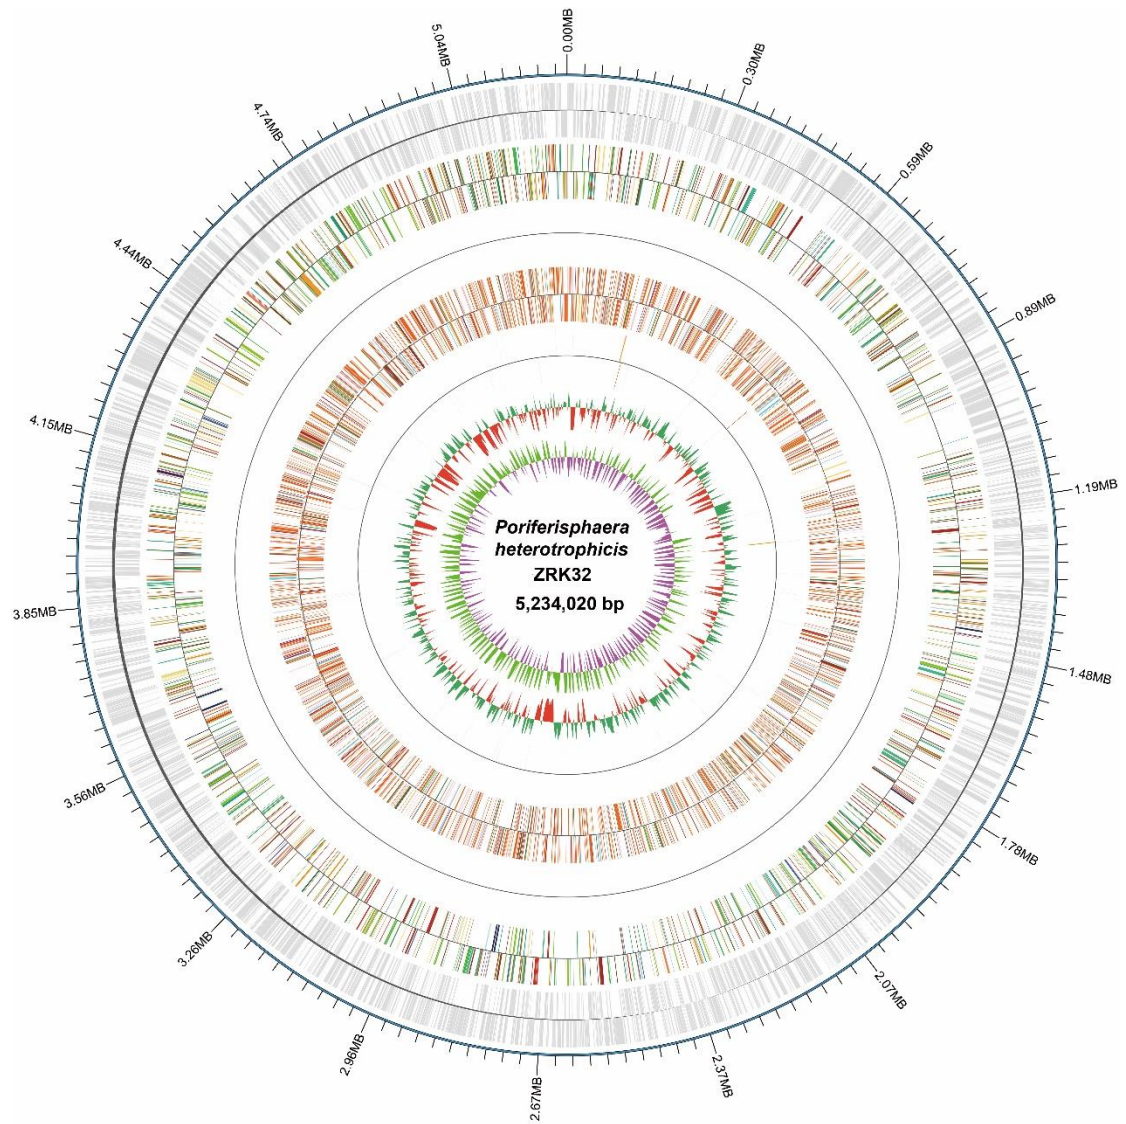

269

270 **Figure S3. Circular diagram of the *P. heterotrophicis* ZRK32 genome.** Rings

271 indicate, from outside to the center: a genome-wide marker with a scale of 0.3 MB;

272 coding genes; gene function annotation results; ncRNA; GC content; GC skew.

273

274

275

276

277

278

279

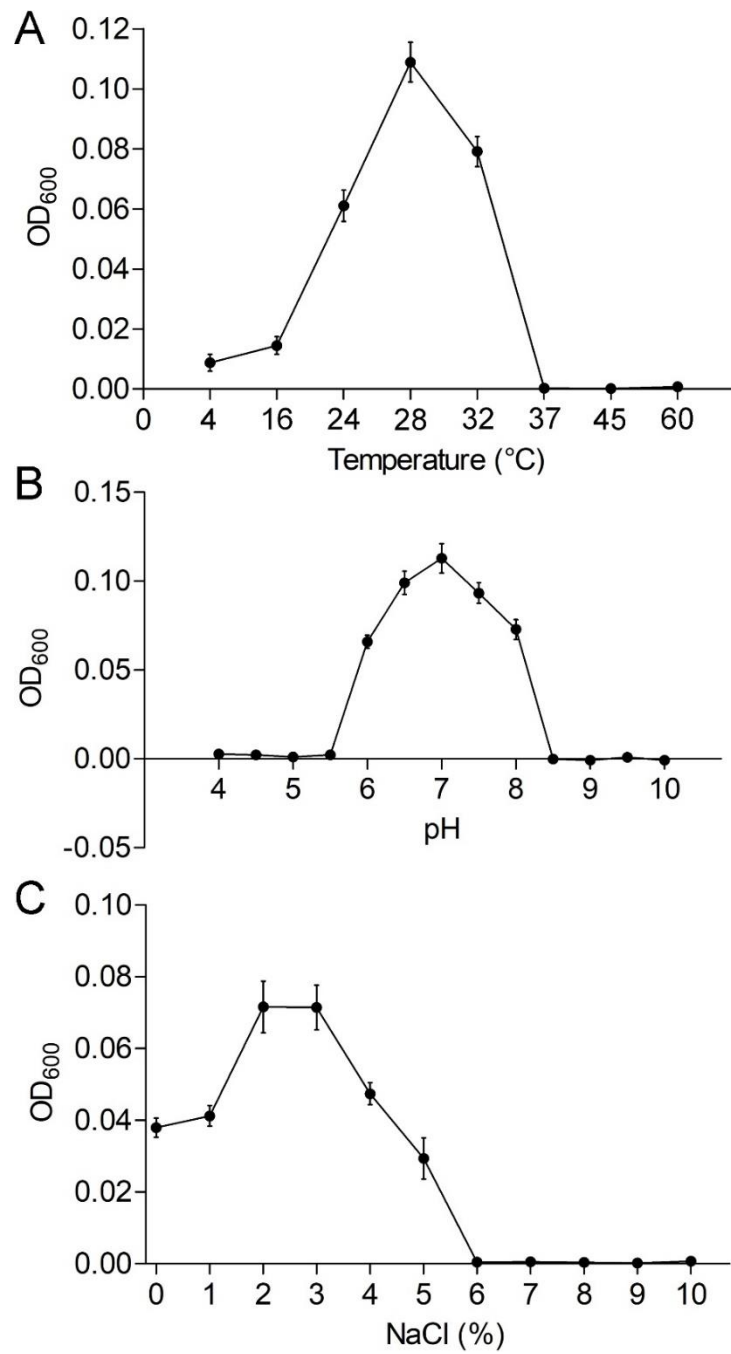

280

281 **Figure S4. Physiological characterizations of *P. heterotrophicis* ZRK32.** Growth  
 282 curves of ZRK32 strains cultivated in different conditions. Temperature (A), pH (B),  
 283 and NaCl concentration (C) ranges enabling growth were analyzed of ZRK32 strains  
 284 cultivated in rich medium with three biological triplicates.

285

286

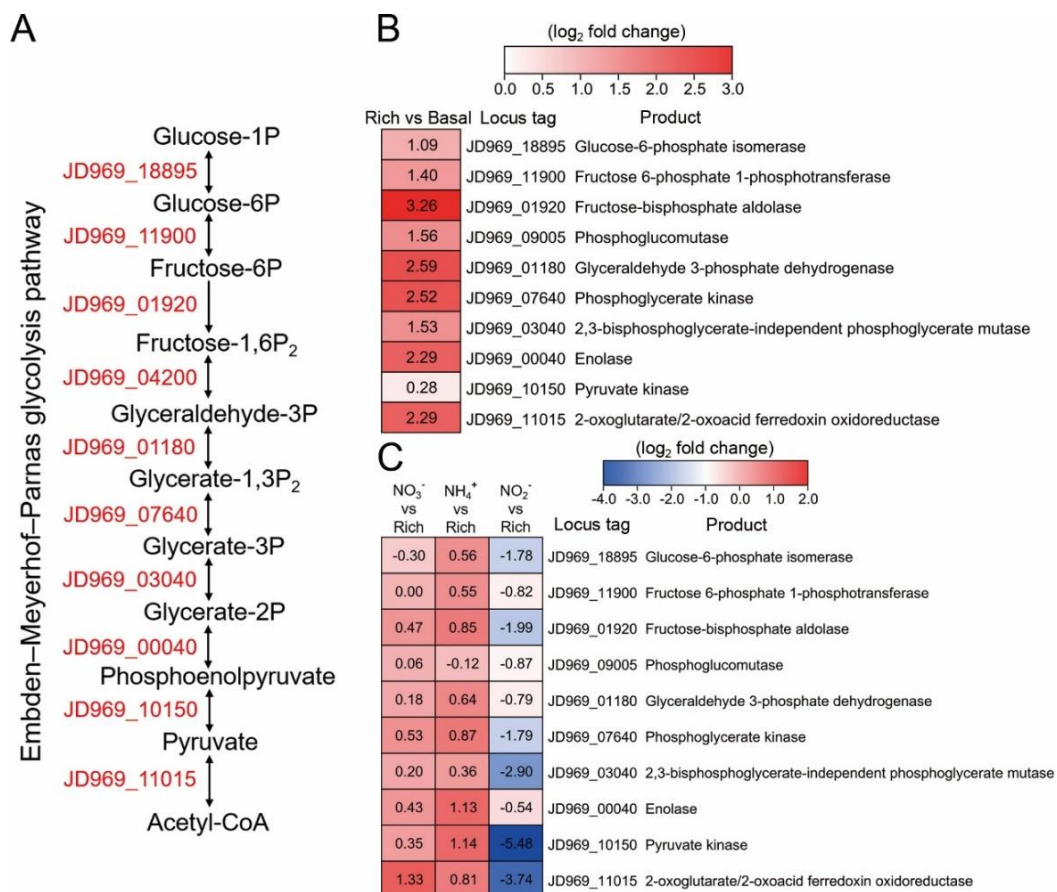

287

288 **Figure S5. Transcriptomics analysis of the genes associated with the EMP**  
 289 **glycolysis pathway of *P. heterotrophicis* ZRK32 strains cultivated in the rich**  
 290 **medium alone and cultivated in rich medium supplemented with either 20 mM**  
 291 **NO<sub>3</sub><sup>-</sup>, 20 mM NH<sub>4</sub><sup>+</sup>, or 20 mM NO<sub>2</sub><sup>-</sup>. (A) Diagram of the EMP glycolysis pathway.**  
 292 The gene numbers shown in this schematic are the same as those shown in panels B  
 293 and C. (B) Transcriptomics-based heat map showing differentially expressed genes  
 294 associated with the EMP glycolysis pathway of strain ZRK32 cultivated in rich  
 295 medium (Rich) compared with strains cultivated in basal medium (Basal). (C)  
 296 Transcriptomics-based heat map showing the relative expression levels of genes  
 297 associated with the EMP glycolysis pathway of strain ZRK32 cultivated in the rich  
 298 medium supplemented with different inorganic nitrogen sources (20 mM NO<sub>3</sub><sup>-</sup>, 20  
 299 mM NH<sub>4</sub><sup>+</sup> or 20 mM NO<sub>2</sub><sup>-</sup>) compared with strains cultivated in the rich medium alone.  
 300 “Rich” indicates rich medium. “NO<sub>3</sub><sup>-</sup>, NH<sub>4</sub><sup>+</sup>, and NO<sub>2</sub><sup>-</sup>” indicate rich medium  
 301 supplemented with 20 mM NO<sub>3</sub><sup>-</sup>, 20 mM NH<sub>4</sub><sup>+</sup>, and 20 mM NO<sub>2</sub><sup>-</sup>, respectively. The  
 302 numbers in panels B and C represent the fold change of gene expression (by using the  
 303 log<sub>2</sub> value).

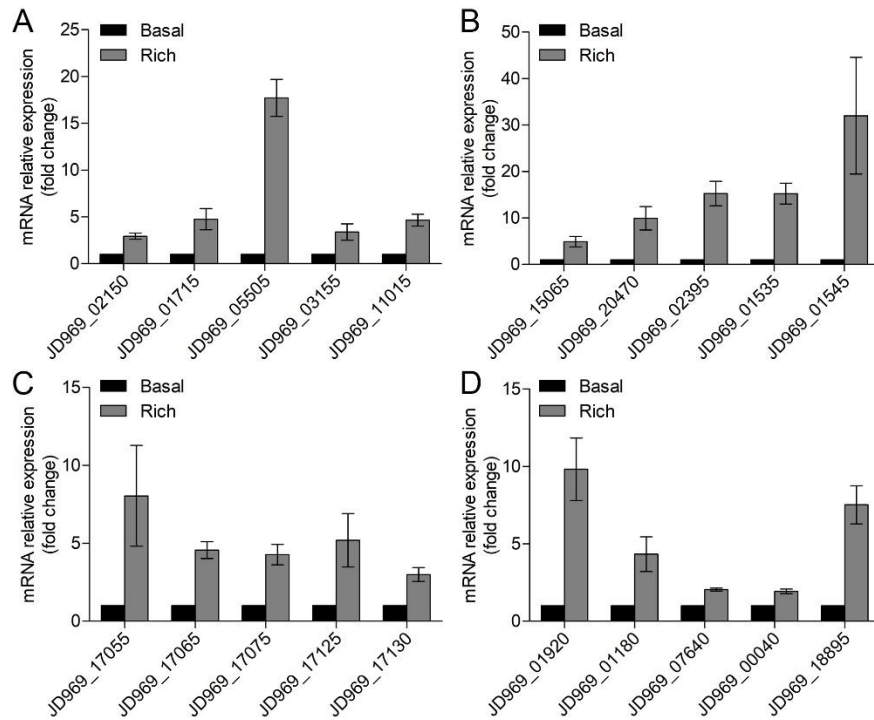

304

305 **Figure S6. qRT-PCR detection of the relative expression levels of the genes**  
 306 **associated with the TCA cycle (A), NADH-quinone oxidoreductase (B), flagellar**  
 307 **assembly (C), and EMP glycolysis pathway (D) of *P. heterotrophicis* ZRK32**  
 308 **strains cultivated in rich medium (Rich) compared with strains cultivated in**  
 309 **basal medium (Basal). JD969\_02150, succinate dehydrogenase; JD969\_01715,**  
 310 **fumarate hydratase; JD969\_05505, malate dehydrogenase; JD969\_03155, isocitrate**  
 311 **dehydrogenase; JD969\_11015, 2-oxoglutarate ferredoxin oxidoreductase;**  
 312 **JD969\_15065, NADH-quinone oxidoreductase subunit A; JD969\_20470,**  
 313 **NADH-quinone oxidoreductase subunit C; JD969\_02395, NADH-quinone**  
 314 **oxidoreductase subunit F; JD969\_01535, NADH-quinone oxidoreductase subunit L;**  
 315 **JD969\_01545, NADH-quinone oxidoreductase subunit N; JD969\_17055, flagellar**  
 316 **basal body rod protein FlgB; JD969\_17065, flagellar hook-basal body protein FliE;**  
 317 **JD969\_17075, flagellar motor switch protein FliG; JD969\_17125, motility protein**  
 318 **MotA; JD969\_17130, motility protein MotB; JD969\_01920, fructose-bisphosphate**  
 319 **aldolase; JD969\_01180, glyceraldehyde 3-phosphate dehydrogenase; JD969\_07640,**  
 320 **phosphoglycerate kinase; JD969\_00040, enolase; JD969\_18895, glucose-6-phosphate**  
 321 **isomerase.**

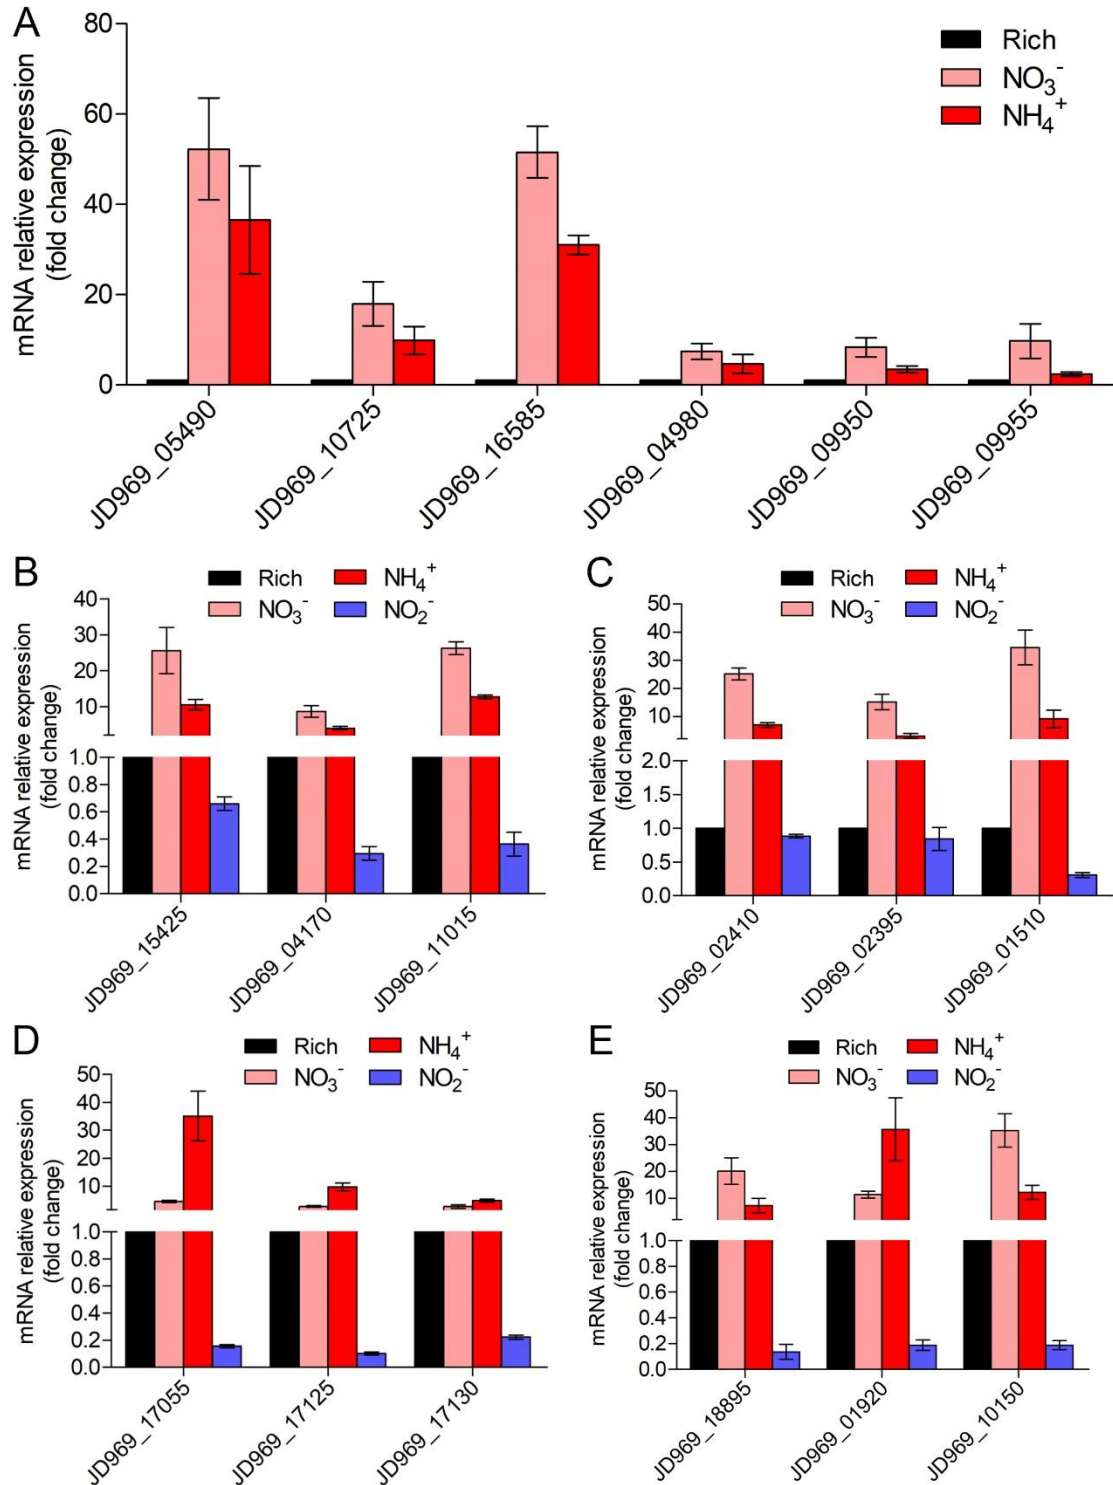

322

323 **Figure S7. qRT-PCR detection of the relative expression levels of the genes**  
 324 **associated with nitrogen metabolism (A), TCA cycle (B), NADH-quinone**  
 325 **oxidoreductase (C), flagellar assembly (D), and EMP glycolysis pathway (E) of**  
 326 **ZRK32 strains cultivated in the rich medium supplemented with different**  
 327 **inorganic nitrogen sources (20 mM NO<sub>3</sub><sup>-</sup>, 20 mM NH<sub>4</sub><sup>+</sup> or 20 mM NO<sub>2</sub><sup>-</sup>)**



328 **compared with strains cultivated in the rich medium alone.** “Rich” indicates rich  
329 medium. “NO<sub>3</sub><sup>-</sup>, NH<sub>4</sub><sup>+</sup>, and NO<sub>2</sub><sup>-</sup>” indicate rich medium supplemented with 20 mM  
330 NO<sub>3</sub><sup>-</sup>, 20 mM NH<sub>4</sub><sup>+</sup>, and 20 mM NO<sub>2</sub><sup>-</sup>, respectively. JD969\_05490, nitrate reductase;  
331 JD969\_10725, nitrate reductase; JD969\_16585, nitrite reductase; JD969\_04980,  
332 glutamine synthetase; JD969\_09950, glutamate synthase; JD969\_09955, glutamate  
333 synthase; JD969\_15425, citrate synthase; JD969\_04170, aconitate hydratase;  
334 JD969\_11015, 2-oxoglutarate ferredoxin oxidoreductase; JD969\_02410,  
335 NADH-quinone oxidoreductase subunit D; JD969\_02395, NADH-quinone  
336 oxidoreductase subunit F; JD969\_01510, NADH-quinone oxidoreductase subunit G;  
337 JD969\_17055, flagellar basal body rod protein FlgB; JD969\_17125, motility protein  
338 MotA; JD969\_17130, motility protein MotB; JD969\_18895, glucose-6-phosphate  
339 isomerase; JD969\_01920, fructose-bisphosphate aldolase; JD969\_10150, pyruvate  
340 kinase.

341

342

343

344

345

346

347

348

349

350

351

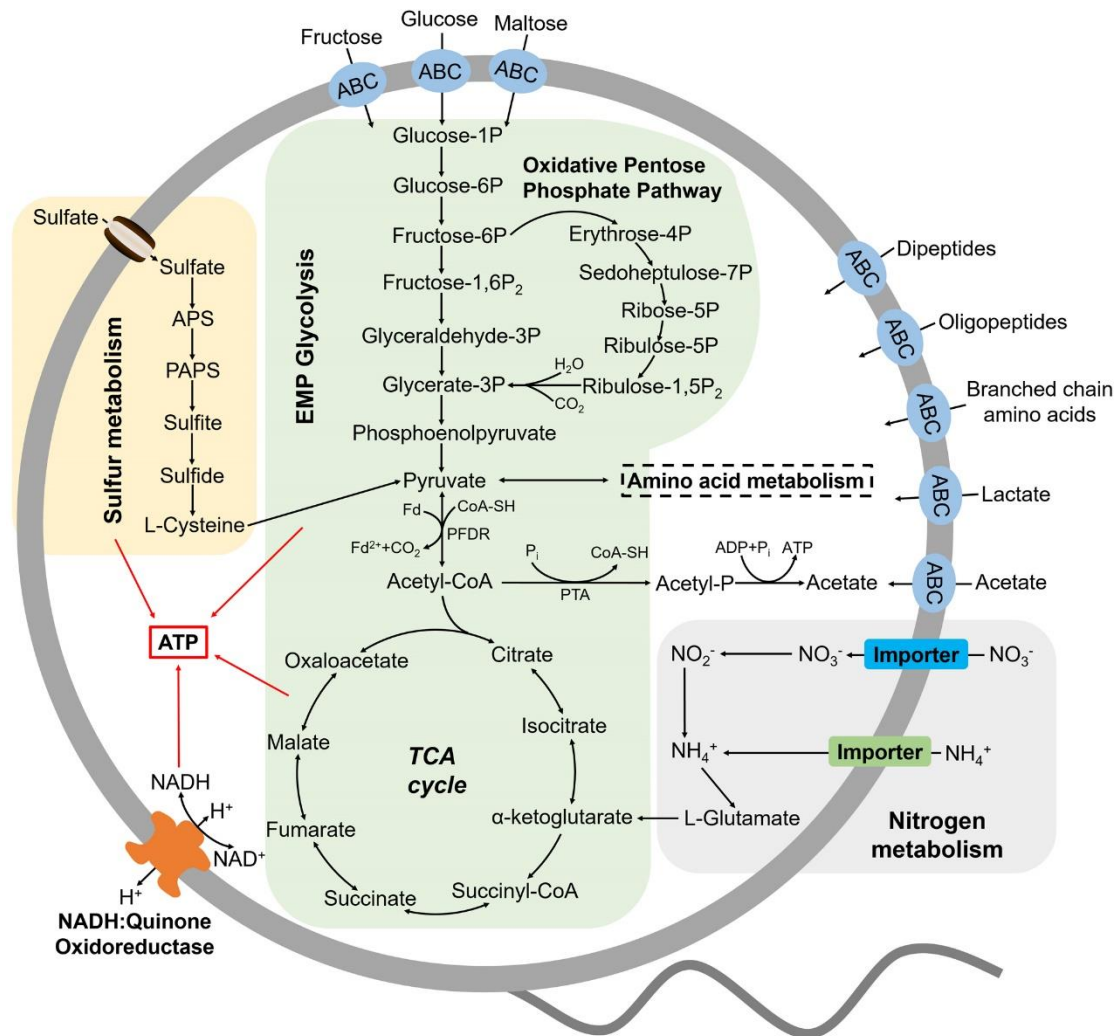

352

353 **Figure S8. Multi-omics based central metabolism model of *P. heterotrophicis***  
 354 **ZRK32.** Based on the combination of genomic, transcriptomic and physiological  
 355 characteristics, we proposed a model towards the central metabolic traits of strain  
 356 ZRK32. In this model, central metabolisms including the EMP glycolysis pathway,  
 357 the oxidative pentose phosphate pathway, the TCA cycle, sulfur metabolism, nitrogen  
 358 metabolism and electron transport system were shown. All the above items are closely  
 359 related to the energy production in strain ZRK32. Briefly, strain ZRK32 contains a  
 360 number of genes related to ABC transporters of amino acids and peptides, which  
 361 could transport these organic matters into the cell to participate in the EMP glycolysis  
 362 and oxidative pentose phosphate pathway. These processes eventually drive the  
 363 formation of pyruvate and acetyl-CoA, which enter the TCA cycle to produce energy  
 364 for the growth of strain ZRK32. Moreover, nitrate could be converted to ammonium

365 through the dissimilatory nitrate reduction, which participates in the synthesis of  
366 L-Glutamate and thereby entering into the TCA cycle for energy generation.  
367 Meanwhile, the H<sup>+</sup>-transporting NADH: Quinone oxidoreductase required for energy  
368 production is present in strain ZRK32. Strain ZRK32 also contains a complete  
369 pathway for assimilatory sulfate reduction, which contributes to to energy production.

370

371

372

373

374

375

376

377

378

379

380

381

382

383

384

385

386

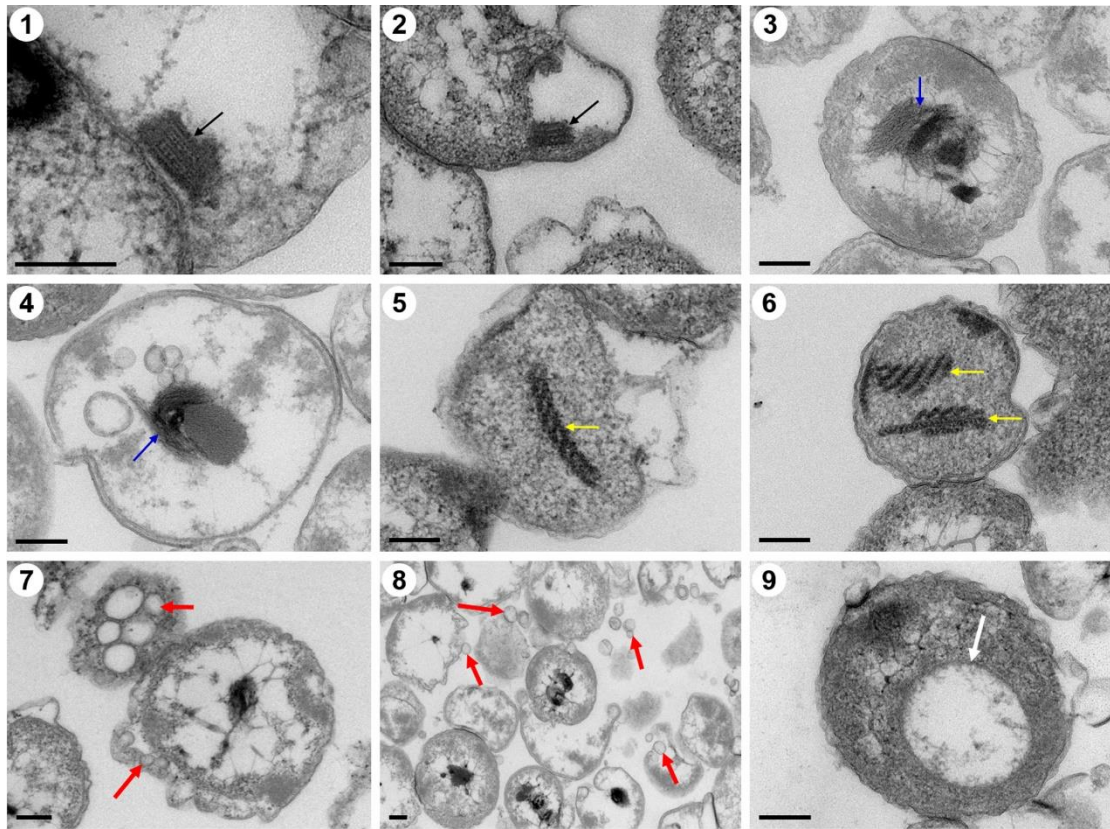

387

388 **Figure S9. Ultrathin TEM sections showing some eukaryote-like structures**  
389 **observed in cells from *P. heterotrophicis* ZRK32. Bars: 200 nm.**

390

391

392

393

394

395

396

397

398

399

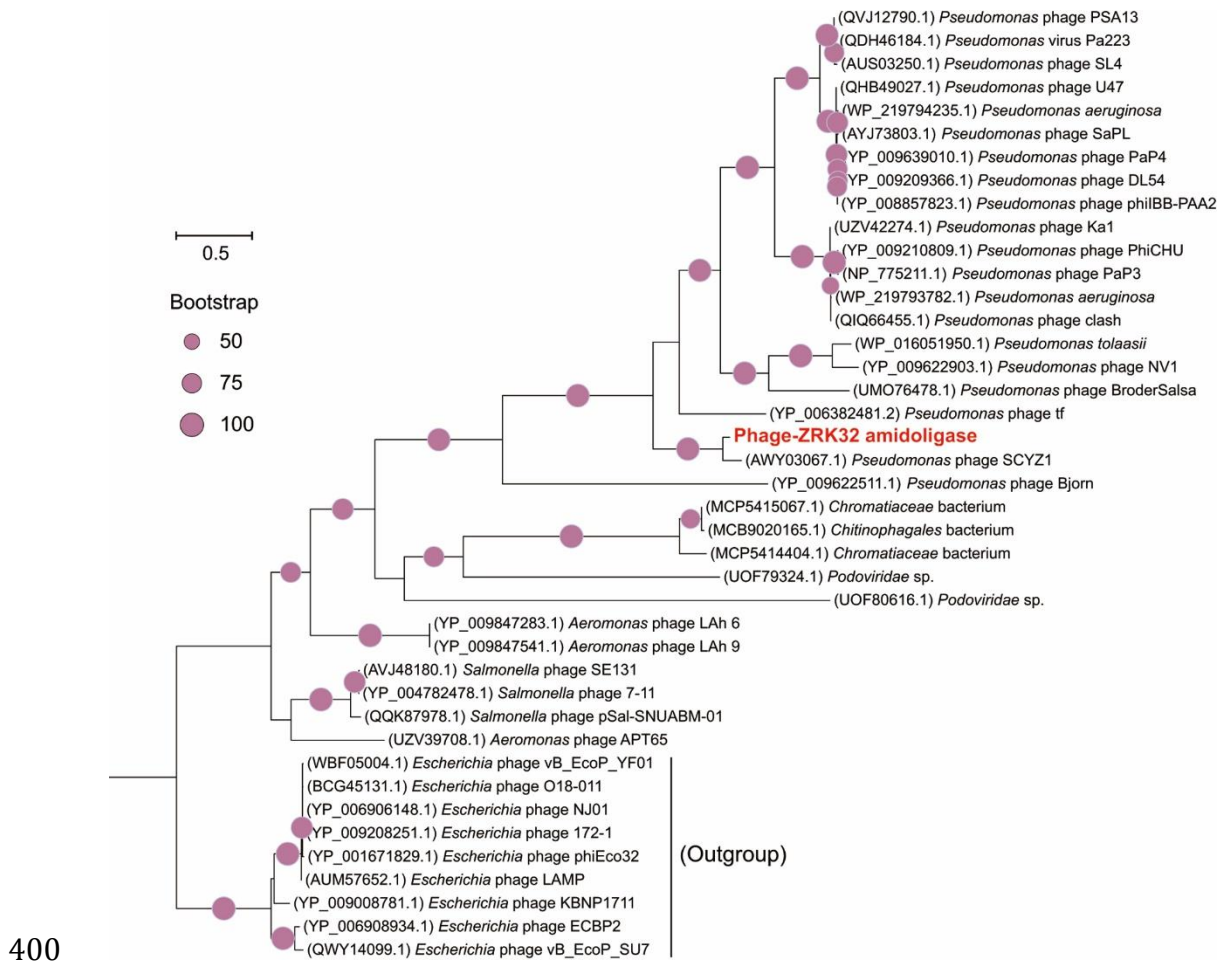

400

401 **Figure S10. Phylogenetic analysis of Phage-ZRK32, some related phages, and**

402 **bacterial hosts, based on the aligned amino acid sequences of amidoligase. The**

403 **NCBI accession number for each amino acid sequence is indicated after each**

404 **corresponding strain's name. The amino acid sequences of amidoligase from nine**

405 ***Escherichia* phages were used as the outgroup. The tree was inferred and**

406 **reconstructed using the maximum likelihood criterion, with bootstrap values (%) > 50;**

407 **these are indicated at the base of each node with a gray dot (expressed as a percentage**

408 **from 1,000 replications). Bar, 0.5 substitutions per nucleotide position.**

409

410

411

412

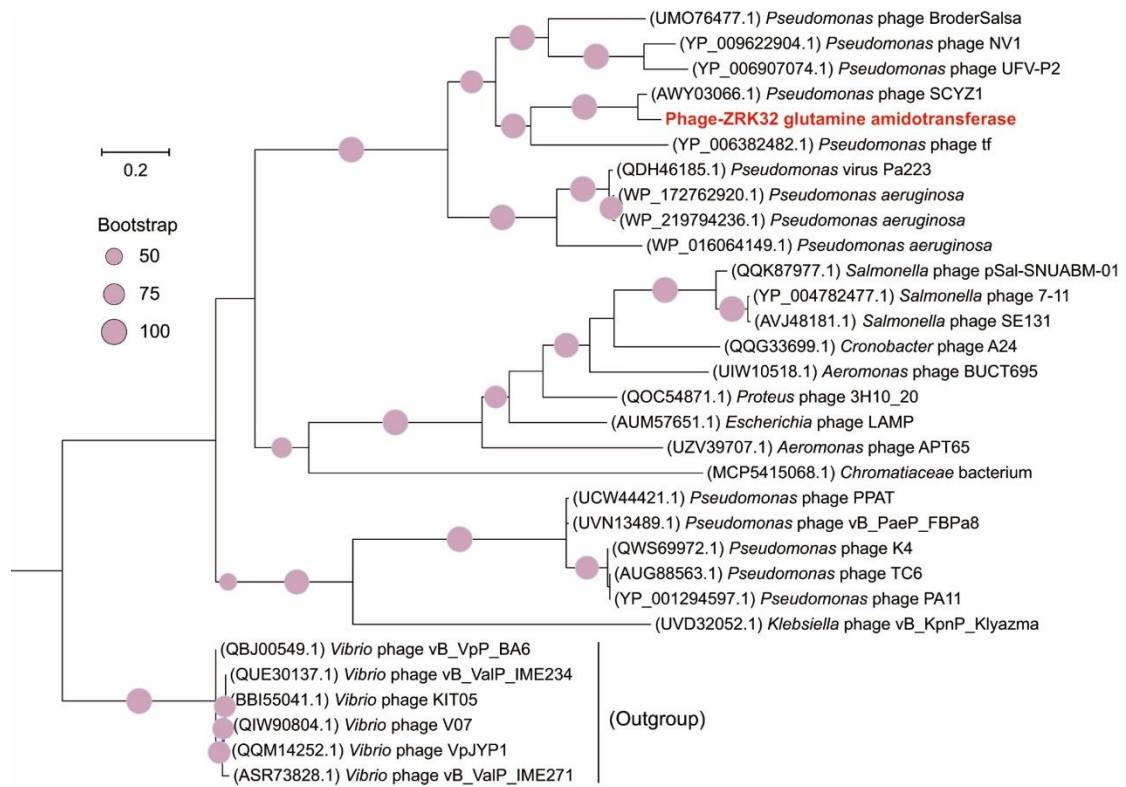

413

414 **Figure S11. Phylogenetic analysis of Phage-ZRK32, some related phages, and**  
 415 **bacterial hosts, based on the aligned amino acid sequences of glutamine**  
 416 **amidotransferase.** The NCBI accession number for each amino acid sequence is  
 417 indicated after each corresponding strain's name. The amino acid sequences of  
 418 glutamine amidotransferase from six *Vibrio* phages were used as the outgroup. The  
 419 tree was inferred and reconstructed using the maximum likelihood criterion, with  
 420 bootstrap values (%) > 50; these are indicated at the base of each node with a gray dot  
 421 (expressed as a percentage from 1,000 replications). Bar, 0.2 substitutions per  
 422 nucleotide position.

423

424

425

426

427

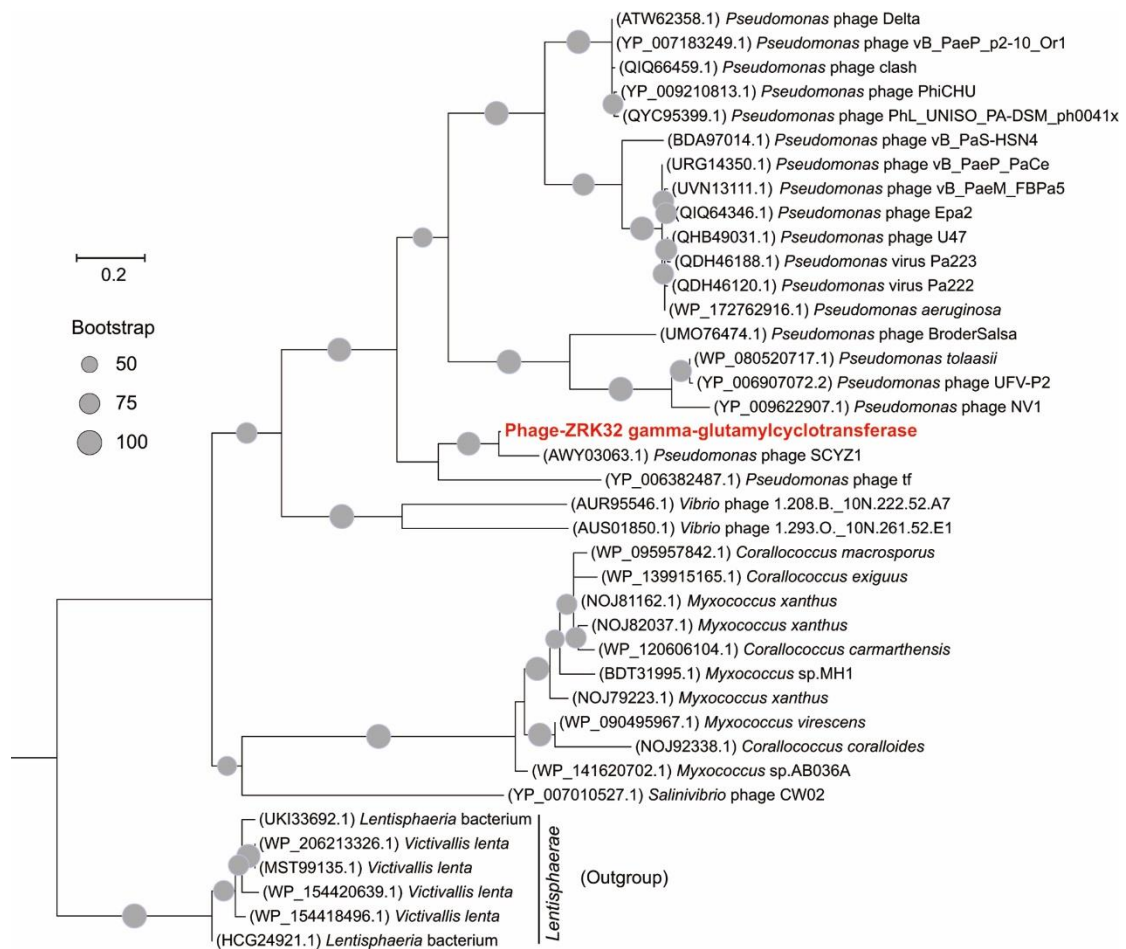

428

429 **Figure S12. Phylogenetic analysis of Phage-ZRK32, some related phages, and**  
430 **bacterial hosts, based on the aligned amino acid sequences of**  
431 **gamma-glutamylcyclotransferase.** The NCBI accession number for each amino acid  
432 sequence is indicated after each corresponding strain's name. The amino acid  
433 sequences of gamma-glutamylcyclotransferase from six *Lentisphaerae* strains were  
434 used as the outgroup. The tree was inferred and reconstructed using the maximum  
435 likelihood criterion, with bootstrap values (%) > 50; these are indicated at the base of  
436 each node with a gray dot (expressed as a percentage from 1,000 replications). Bar,  
437 0.2 substitutions per nucleotide position.

438

439

440

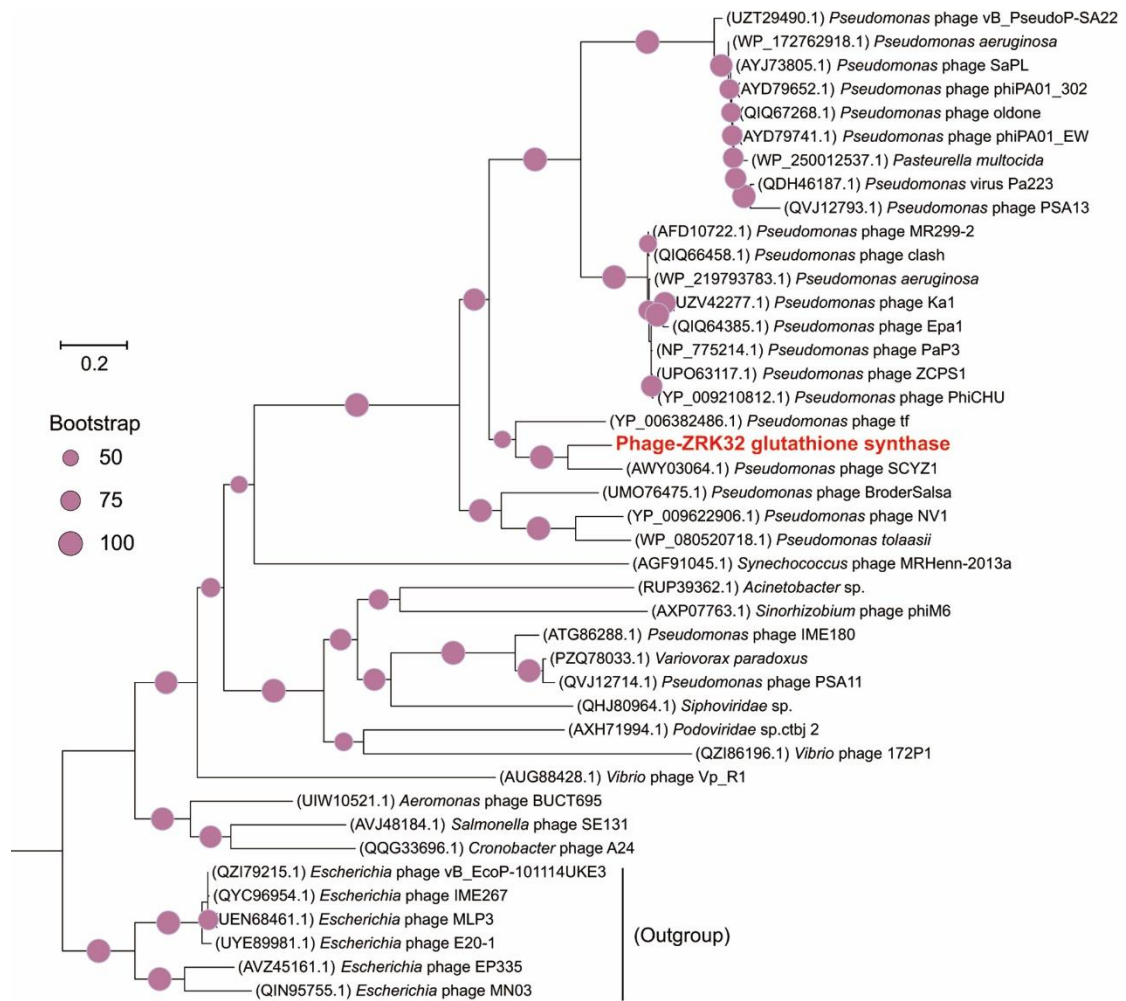

442 **Figure S13. Phylogenetic analysis of Phage-ZRK32, some related phages, and**  
 443 **bacterial hosts, based on the aligned amino acid sequences of glutathione**  
 444 **synthase.** The NCBI accession number for each amino acid sequence is indicated  
 445 after each corresponding strain's name. The amino acid sequences of glutathione  
 446 synthase from six *Escherichia* phages were used as the outgroup. The tree was  
 447 inferred and reconstructed using the maximum likelihood criterion, with bootstrap  
 448 values (%) > 50; these are indicated at the base of each node with a gray dot  
 449 (expressed as a percentage from 1,000 replications). Bar, 0.2 substitutions per  
 450 nucleotide position.

451

452



453 **Supplementary Tables**454 **Table S1. Phenotypic and genotypic features of strain ZRK32 and the most**  
455 **closely related type strain *Poriferisphaera corsica* KS4<sup>T</sup>.**

| <b>Feature</b>                          | <b>ZRK32</b>                | <b>KS4<sup>T</sup></b>      |
|-----------------------------------------|-----------------------------|-----------------------------|
| <b>Phenotypic features</b>              |                             |                             |
| Cell morphology                         | spherical                   | spherical                   |
| Cell diameter (µm)                      | 0.4-1.0                     | 0.63 ± 0.21                 |
| Temperature range for growth ( °C)      | 4-32                        | 15-30                       |
| Optimum                                 | 28                          | 27                          |
| pH for growth                           | 6.0-8.0                     | 6.5-8.0                     |
| Optimum                                 | 7.0                         | 7.5                         |
| NaCl concentration range for growth (%) | 0-5                         | 0-4                         |
| Isolation source                        | Deep-sea cold seep sediment | Coast of the island Corsica |
| <b>Genomic features</b>                 |                             |                             |
| Gene Bank ID                            | CP066225                    | CP036425                    |
| Genome size (bp)                        | 5,234,020                   | 4,291,168                   |
| G+C content (mol%)                      | 46.28                       | 48.7                        |
| No.scaffolds/contigs                    | 1                           | 1                           |
| No. of genes                            | 4,175                       | 3,714                       |
| No. of rRNAs                            | 6                           | 3                           |
| No. of tRNAs                            | 45                          | 45                          |
| No. of protein-coding genes             | 4,121                       | 3,659                       |
| Completeness (%)                        | 100                         | 94.83                       |
| ANIb (%)                                | 100                         | 72.89                       |
| ANIm (%)                                | 100                         | 85.34                       |
| Tetra                                   | 1                           | 0.97385                     |
| <i>isDDH</i> (%)                        | 100                         | 20.90                       |

456

457

458

459

460

461 **Table S2. The sugar utilization of strain ZRK32.** +, Positive result or growth; -,  
462 negative result or no growth.

| <b>Sugar species</b> | <b>Utilization</b> |
|----------------------|--------------------|
| Glucose              | +                  |
| Maltose              | +                  |
| Fructose             | +                  |
| Sucrose              | -                  |
| Starch               | -                  |
| Isomaltose           | +                  |
| Trehalose            | -                  |
| Galactose            | +                  |
| Cellulose            | -                  |
| Xylose               | -                  |
| D-mannose            | +                  |
| Rhamnose             | +                  |

463

464

465

466

467

468

469

470

471

472

473

474

475

476 **Table S3. Marker genes used in the phylogenetic analysis.**

| <b>ID</b>    | <b>Protein</b>                             |
|--------------|--------------------------------------------|
| DNGNGWU00001 | ribosomal protein S2 rpsB                  |
| DNGNGWU00002 | ribosomal protein S10 rpsJ                 |
| DNGNGWU00003 | ribosomal protein L1 rplA                  |
| DNGNGWU00005 | translation initiation factor IF-2         |
| DNGNGWU00006 | metalloendopeptidase                       |
| DNGNGWU00007 | ribosomal protein L22                      |
| DNGNGWU00009 | ribosomal protein L4/L1e rplD              |
| DNGNGWU00010 | ribosomal protein L2 rplB                  |
| DNGNGWU00011 | ribosomal protein S9 rpsI                  |
| DNGNGWU00012 | ribosomal protein L3 rplC                  |
| DNGNGWU00013 | phenylalanyl-tRNA synthetase beta subunit  |
| DNGNGWU00014 | ribosomal protein L14b/L23e rplN           |
| DNGNGWU00015 | ribosomal protein S5                       |
| DNGNGWU00016 | ribosomal protein S19 rpsS                 |
| DNGNGWU00017 | ribosomal protein S7                       |
| DNGNGWU00018 | ribosomal protein L16/L10E rplP            |
| DNGNGWU00019 | ribosomal protein S13 rpsM                 |
| DNGNGWU00020 | phenylalanyl-tRNA synthetase alpha subunit |
| DNGNGWU00021 | ribosomal protein L15                      |
| DNGNGWU00022 | ribosomal protein L25/L23                  |
| DNGNGWU00023 | ribosomal protein L6 rplF                  |
| DNGNGWU00024 | ribosomal protein L11 rplK                 |
| DNGNGWU00025 | ribosomal protein L5 rplE                  |
| DNGNGWU00026 | ribosomal protein S12/S23                  |
| DNGNGWU00027 | ribosomal protein L29                      |
| DNGNGWU00028 | ribosomal protein S3 rpsC                  |
| DNGNGWU00029 | ribosomal protein S11 rpsK                 |
| DNGNGWU00030 | ribosomal protein L10                      |
| DNGNGWU00031 | ribosomal protein S8                       |
| DNGNGWU00032 | tRNA pseudouridine synthase B              |
| DNGNGWU00033 | ribosomal protein L18P/L5E                 |
| DNGNGWU00034 | ribosomal protein S15P/S13e                |
| DNGNGWU00035 | Porphobilinogen deaminase                  |
| DNGNGWU00036 | ribosomal protein S17                      |
| DNGNGWU00037 | ribosomal protein L13 rplM                 |
| DNGNGWU00039 | ribonuclease HII                           |
| DNGNGWU00040 | ribosomal protein L24                      |

477 The DNGNGWU marker genes in phylosift refer to a suite of single-copy, protein-  
478 coding marker genes. All 37 DNGNGWU marker genes were concatenated to  
479 construct maximum likelihood phylogenetic tree.

480

481 **Table S4. Primers used for qRT-PCR.**

| <b>Primer name</b> | <b>Nucleotide Sequence (5'-3')</b> |
|--------------------|------------------------------------|
| 16S-F              | CCCTTCCTTTGGGTCTGGTC               |
| 16S-R              | TTCCGCAATGCACGAAAGTG               |
| JD969_02150-F      | TACTGCTGAAGGCTTCCGTG               |
| JD969_02150-R      | ACGAGTTTGCTCGTCCAGAG               |
| JD969_01715-F      | CCAAGTGTGTACCACCGAT                |
| JD969_01715-R      | TGTTTGCTGGTTATGCACGC               |
| JD969_05505-F      | ATCAGCGAAGAACGCCTCAA               |
| JD969_05505-R      | TTCAGCCATCTGGACGGAAC               |
| JD969_03155-F      | TCCGCTACTTTGATGGCGTT               |
| JD969_03155-R      | TCGATGCCTGCGTAGATGTC               |
| JD969_11015-F      | GTTTGCGAAGGCGTTTGAT                |
| JD969_11015-R      | TCCAGACCAACACTCAAGCC               |
| JD969_15065-F      | AGCGGAAGACACCTTTACGG               |
| JD969_15065-R      | GCACACAACCTTGCCGATGTT              |
| JD969_20470-F      | GGGTGTCCATCGAAACGGAT               |
| JD969_20470-R      | CATCGAAGAAGACCCCGCAT               |
| JD969_02395-F      | AAGGAAGCCGGTACATGTGG               |
| JD969_02395-R      | GCCCAACCATCGTCAACAAC               |
| JD969_01535-F      | CTCACCGCTGGTTCAGTCAT               |
| JD969_01535-R      | AGCCGAAGAACATGAGCCAA               |
| JD969_01545-F      | TGCTCTGGGTATCGCTGTC                |
| JD969_01545-R      | GTGAGCGACGGAGGAGTATG               |
| JD969_17055-F      | CGTCATCGTGTACTGGCAGA               |
| JD969_17055-R      | ACGTCGCTCACCAATAGCTC               |
| JD969_17065-F      | TTCAGCCTAAACAGGCGGTC               |
| JD969_17065-R      | GCATGCGATTCACTTGCTCA               |
| JD969_17075-F      | CCGCAGGCTTATGTTTCGTCT              |
| JD969_17075-R      | GAGCCAAAGCCAATTCGTCG               |
| JD969_17125-F      | CACTCGCTGATCGTCTCGAA               |
| JD969_17125-R      | AACGCGAGGGTTATCACCAG               |
| JD969_17130-F      | CAGTTACGAACGTGCCAACG               |
| JD969_17130-R      | TCTGCAGTGTAACGCGACT                |

|               |                       |
|---------------|-----------------------|
| JD969_01920-F | GGTAGACGCGTGGATCGTAG  |
| JD969_01920-R | CACCGACACTCAGTACGCAT  |
| JD969_01180-F | ATCGCTGGCATACTTGCTCA  |
| JD969_01180-R | GGGTCACG TTCAGCACAAAC |
| JD969_07640-F | GCCGTCGGAGATATCGTTGT  |
| JD969_07640-R | GGGTGGCGACAAAATCGTTC  |
| JD969_00040-F | ACAGCGATACCGCTAACTCG  |
| JD969_00040-R | CCTGAACGGTGTGAGAGGAC  |
| JD969_18895-F | CCCACATTGGGAAACGCTTG  |
| JD969_18895-R | ATTCGAACGTGCAGGCCTTA  |
| JD969_10150-F | CAGCACACTCAACAACCTGC  |
| JD969_10150-R | CGATGGCTTGGGGTTTTTCG  |
| JD969_02410-F | ATACGCAATGTCGTGTGGGT  |
| JD969_02410-R | TGCGAAACGACGCCTTATCT  |
| JD969_01510-F | CAGCTCGCTACGATCGACAT  |
| JD969_01510-R | AAGAGTGCGAGTACGAAGGC  |
| JD969_15425-F | TCTTCGAGGCACCAGTCAAC  |
| JD969_15425-R | CCGTGTTACGATATCCGGGG  |
| JD969_04170-F | TGCTCACGCAACATCTCAGT  |
| JD969_04170-R | TGATGCTTGGTCAGCCGATT  |
| JD969_05490-F | GGTTTGCTGAATCATCCGCC  |
| JD969_05490-R | CATTGCACGAAGTCAGCACC  |
| JD969_10725-F | GTGTGGTATCCCGGCTTTGA  |
| JD969_10725-R | TTCTGGTGGCCGAATTGTT   |
| JD969_16585-F | GAGTTAGATCCGGGTGCGAG  |
| JD969_16585-R | AATCAGGCGGCCATTCTCAA  |
| JD969_04980-F | CTCCAGGACGCACTCGATAC  |
| JD969_04980-R | GACTGCGTTCATGAGTGGGA  |
| JD969_09950-F | CTTGCACCGGGTATCACCTT  |
| JD969_09950-R | CTTGCACCGGGTATCACCTT  |
| JD969_09955-F | GTACCGGAAGAGCGTGTGAA  |
| JD969_09955-R | TCAGACTGACAGAACGGCAC  |

---

482

483

484 **REFERENCES**

- 485 Anders, S., and Huber, W. (2010) **Differential expression analysis for sequence**  
486 **count data** *Genome Biol* **11**:R106
- 487 Ashburner, M., Ball, C.A., Blake, J.A., Botstein, D., Butler, H., Cherry, J.M., Davis,  
488 A.P., Dolinski, K., Dwight, S.S., Eppig, J.T., et al. (2000) **Gene ontology: tool for**  
489 **the unification of biology. The Gene Ontology Consortium** *Nat Genet* **25**:25-29
- 490 Bairoch, A., and Apweiler, R. (2000) **The SWISS-PROT protein sequence**  
491 **database and its supplement TrEMBL in 2000** *Nucleic Acids Res* **28**:45-48
- 492 Brümmer, I.H., Felske, A.D., and Wagner-Döbler, I. (2004) **Diversity and seasonal**  
493 **changes of uncultured *Planctomycetales* in river biofilms** *Appl Environ Microbiol*  
494 **70**:5094-5101
- 495 Buckley, D.H., Huangyutitham, V., Nelson, T.A., Rumberger, A., and Thies, J.E.  
496 (2006) **Diversity of *Planctomyces* in soil in relation to soil history and**  
497 **environmental heterogeneity** *Appl Environ Microbiol* **72**:4522-4531
- 498 Dedysh, S.N., and Ivanova, A.A. (2019) ***Planctomyces* in boreal and subarctic**  
499 **wetlands: diversity patterns and potential ecological functions** *FEMS Microbiol*  
500 *Ecol* **95**:
- 501 Galperin, M.Y., Makarova, K.S., Wolf, Y.I., and Koonin, E.V. (2015) **Expanded**  
502 **microbial genome coverage and improved protein family annotation in the COG**  
503 **database** *Nucleic Acids Res* **43**:D261-269
- 504 Kanehisa, M., Goto, S., Kawashima, S., Okuno, Y., and Hattori, M. (2004) **The**  
505 **KEGG resource for deciphering the genome** *Nucleic Acids Res* **32**:D277-280
- 506 Kanehisa, M., Araki, M., Goto, S., Hattori, M., Hirakawa, M., Itoh, M., Katayama, T.,  
507 Kawashima, S., Okuda, S., Tokimatsu, T., et al. (2008) **KEGG for linking genomes**  
508 **to life and the environment** *Nucleic Acids Res* **36**:D480-D484
- 509 Langmead, B., and Salzberg, S.L. (2012) **Fast gapped-read alignment with Bowtie**  
510 **2** *Nat Methods* **9**:357-359
- 511 Livak, K.J., and Schmittgen, T.D. (2001) **Analysis of relative gene expression data**  
512 **using real-time quantitative PCR and the 2(-Delta Delta C(T)) Method** *Methods*  
513 **25**:402-408
- 514 Meier-Kolthoff, J.P., Auch, A.F., Klenk, H.P., and Göker, M. (2013) **Genome**  
515 **sequence-based species delimitation with confidence intervals and improved**  
516 **distance functions** *BMC Bioinf* **14**:60
- 517 Pollet, T., Tadonl é R.D., and Humbert, J.F. (2011) **Spatiotemporal changes in the**  
518 **structure and composition of a less-abundant bacterial phylum (*Planctomyces*)**  
519 **in two perialpine lakes** *Appl Environ Microbiol* **77**:4811-4821
- 520 Richter, M., Rossell ó-M ára, R., Oliver Glöckner, F., and Peplies, J. (2016)  
521 **JSpeciesWS: a web server for prokaryotic species circumscription based on**  
522 **pairwise genome comparison** *Bioinformatics* **32**:929-931
- 523 Trapnell, C., Pachter, L., and Salzberg, S.L. (2009) **TopHat: discovering splice**  
524 **junctions with RNA-Seq** *Bioinformatics* **25**:1105-1111

525 Wang, L.K., Feng, Z.X., Wang, X., Wang, X.W., and Zhang, X.G. (2010) **DEGseq:**  
526 **an R package for identifying differentially expressed genes from RNA-seq data**  
527 *Bioinformatics* **26**:136-138  
528 Woebken, D., Teeling, H., Wecker, P., Dumitriu, A., Kostadinov, I., Delong, E.F.,  
529 Amann, R., and Glöckner, F.O. (2007) **Fosmids of novel marine *Planctomycetes***  
530 **from the Namibian and Oregon coast upwelling systems and their**  
531 **cross-comparison with planctomycete genomes** *ISME J* **1**:419-435  
532 Young, M.D., Wakefield, M.J., Smyth, G.K., and Oshlack, A. (2010) **Gene ontology**  
533 **analysis for RNA-seq: accounting for selection bias** *Genome Biol* **11**:R14  
534 Zheng, R., Liu, R., Shan, Y., Cai, R., Liu, G., and Sun, C. (2021) **Characterization of**  
535 **the first cultured free-living representative of *Candidatus Izemoplasma* uncovers**  
536 **its unique biology** *ISME J* **15**:2676-2691

537
